# Supplementary material
Source: publisher figshare collection journal article supplement (https://acs.figshare.com/ndownloader/files/12179363)
Supplement: Supplementary file 1 [file 12179363]

# Supporting Information

## Revisiting Anisotropic Diffusion of Carbon Dioxide in the Metal-Organic Framework Zn<sub>2</sub>(dobpdc)

Alexander C. Forse,<sup>abc</sup> Stephen A. Altobelli,<sup>d</sup> Stefan Benders,<sup>e</sup> Mark S. Conradi,<sup>d</sup> Jeffrey A. Reimer<sup>b,f,\*</sup>

<sup>a</sup>Department of Chemistry, <sup>b</sup>Department of Chemical and Biomolecular Engineering, and <sup>c</sup>Berkeley Energy and Climate Institute,

University of California, Berkeley, California 94720, U.S.A.

<sup>d</sup>ABQMR, Inc., 2301 Yale Blvd SE, Suite C2, Albuquerque, New Mexico 87106, U.S.A.

<sup>e</sup>Institut für Technische und Makromolekulare Chemie (ITMC), RWTH Aachen University, Worringerweg 2, D-52074 Aachen, Germany

<sup>f</sup>Materials Sciences Division, Lawrence Berkeley National Laboratory, Berkeley, California 94720, U.S.A.

\*corresponding author, reimer@berkeley.edu

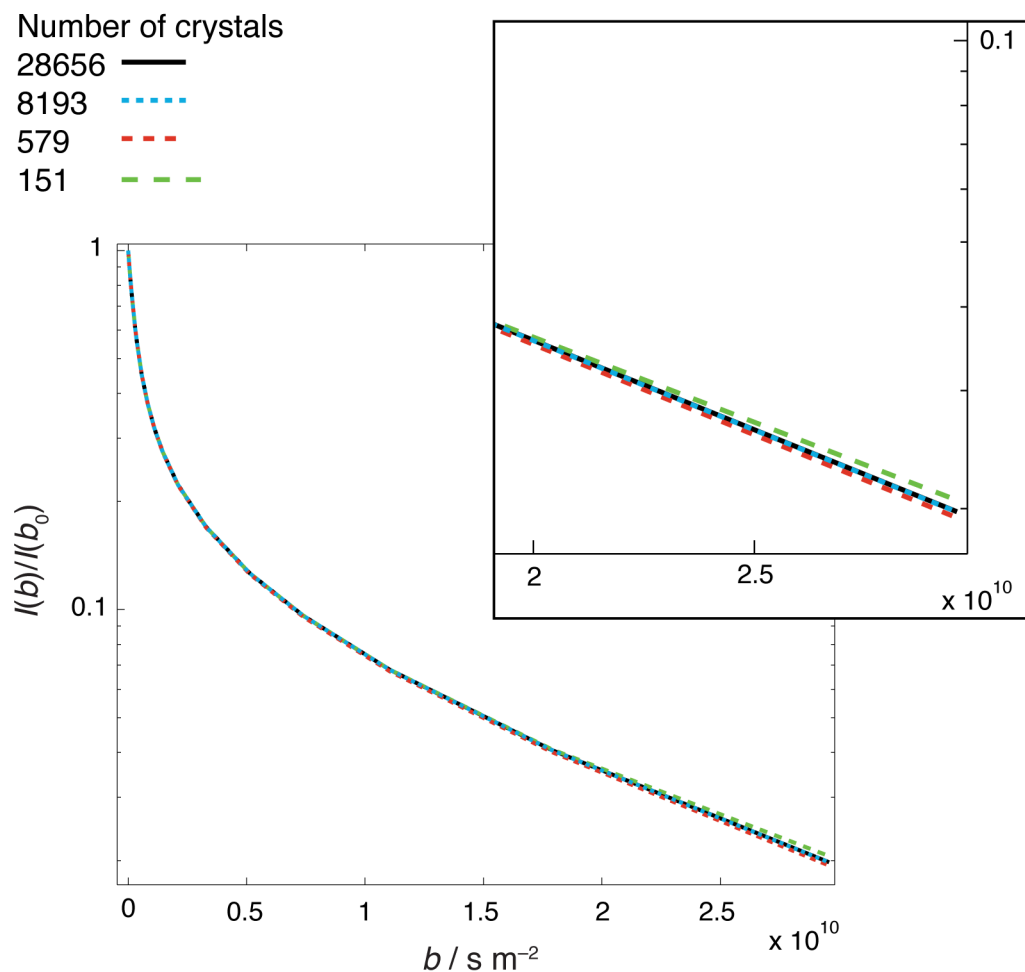

**Figure S1.** Effect of number of crystals used in simulations on total simulated integrated NMR signal intensity as a function of  $b$  value. Simulations for 28656 (zcw scheme), 8193 (ASGh), 579 (ASGh) and 151 (LEBh) crystals are shown, with the crystal files used directly from Simpson software.<sup>1</sup> Other simulation parameters:  $D_{||} = 6.5 \times 10^{-9} \text{ m}^2 \text{ s}^{-1}$ ,  $\delta_{\perp} = 133.0 \text{ ppm}$ ,  $\delta_{||} = 114.5 \text{ ppm}$ , Gaussian lineshapes FWHM of 1.7 ppm, and with no weighting function used. Simulations with 28656 and 8193 give converged results to a very good approximation, while simulations with 579 and 151 crystals show small deviations at large  $b$  values. 28656 crystals were used for all simulations in the main text. The actual number of crystals in our NMR sample may be roughly estimated using crystal sizes from microscope images from our previous work,<sup>2</sup> and the approximate volume of crystals in the NMR tube (5 mm NMR tube, 10 mm sample height), and is of the order of hundreds of thousands of crystals.

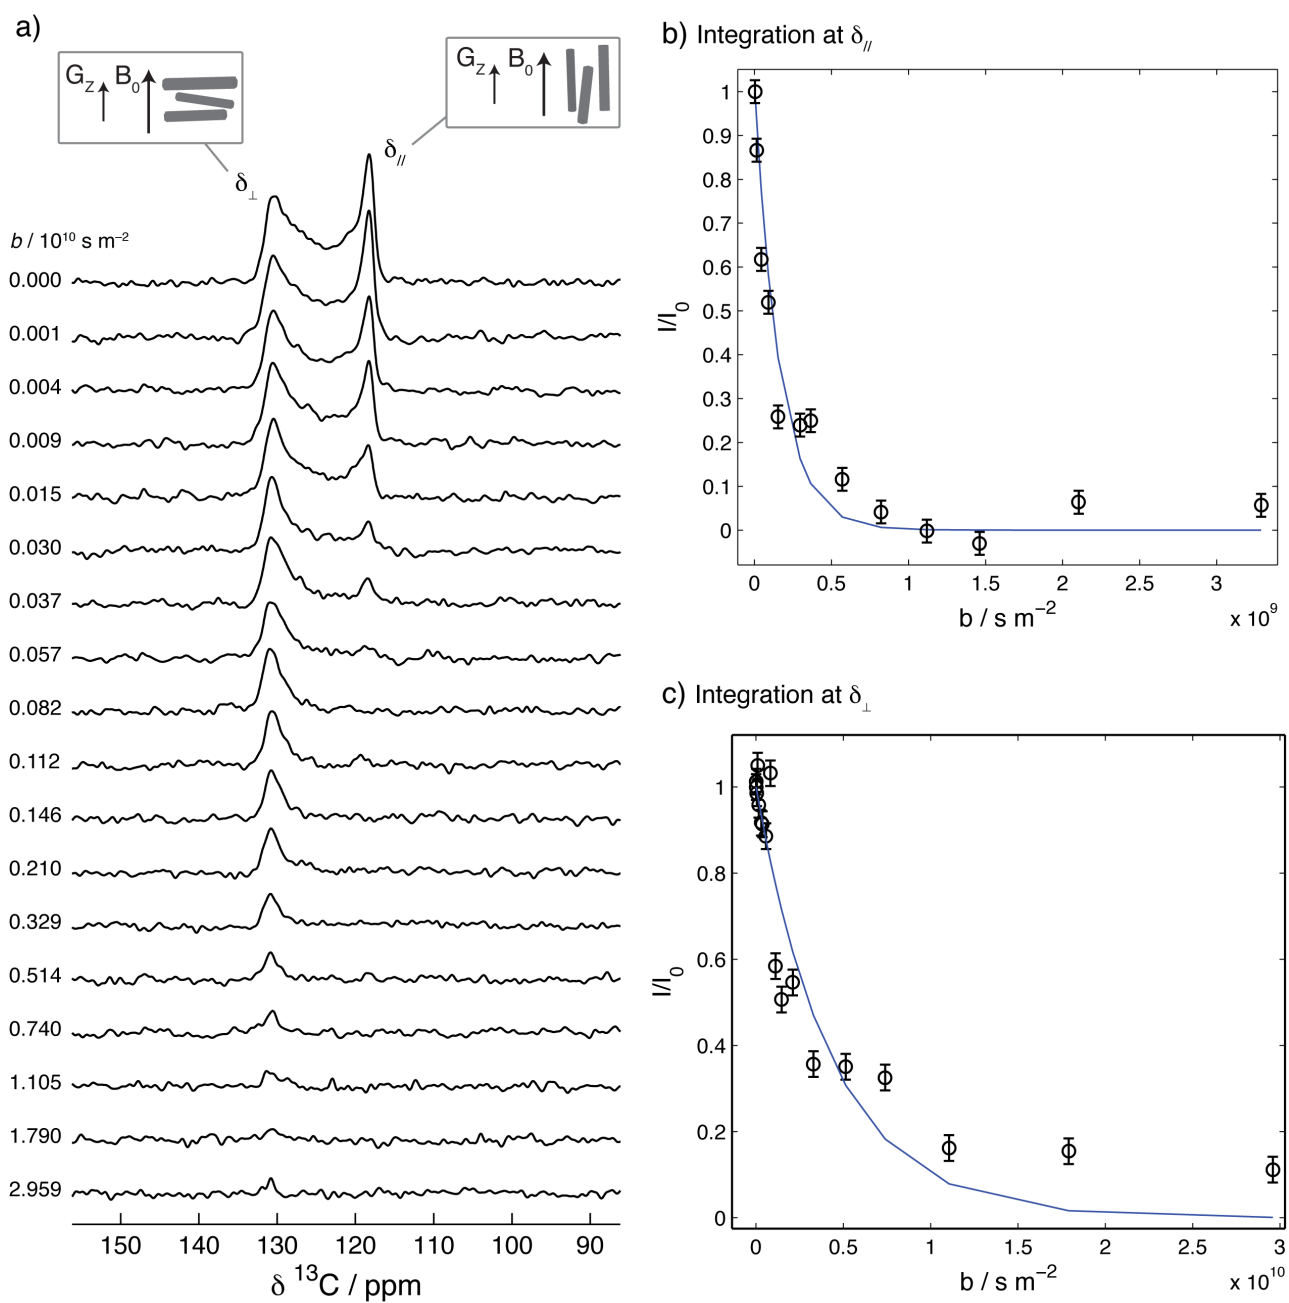

**Figure S2.** Data analogous to Figure 2 in the main text, except for a gas dosing pressure of 1010 mbar.

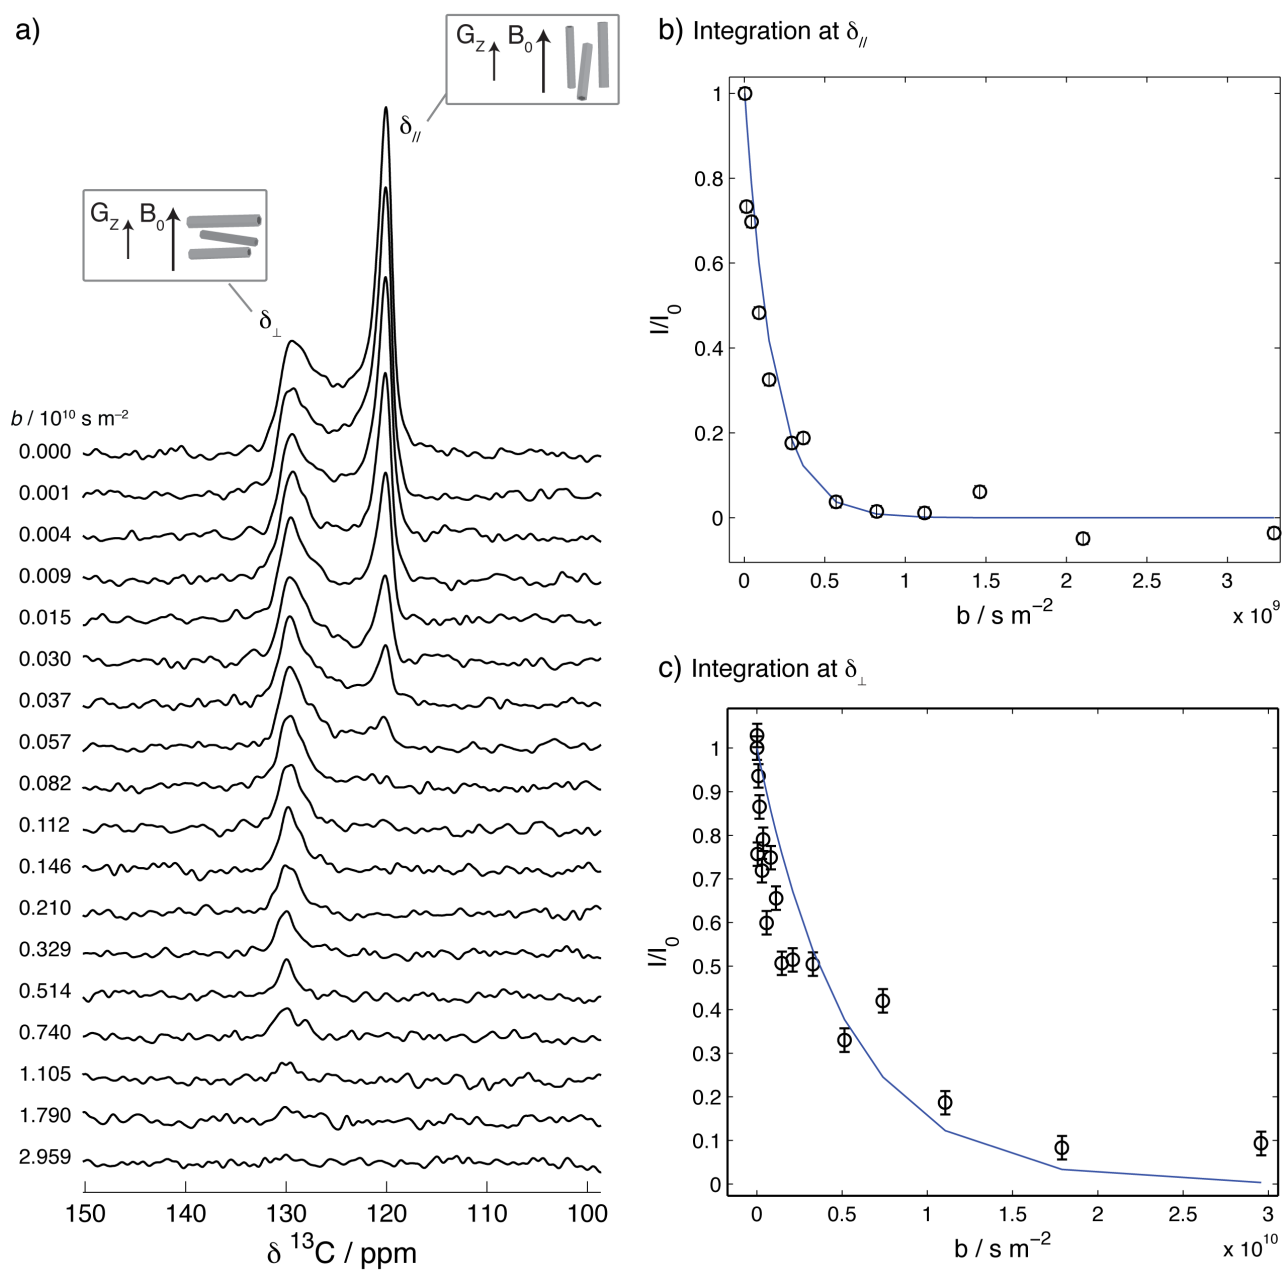

**Figure S3.** Data analogous to Figure 2 in the main text, except for a gas dosing pressure of 625 mbar.

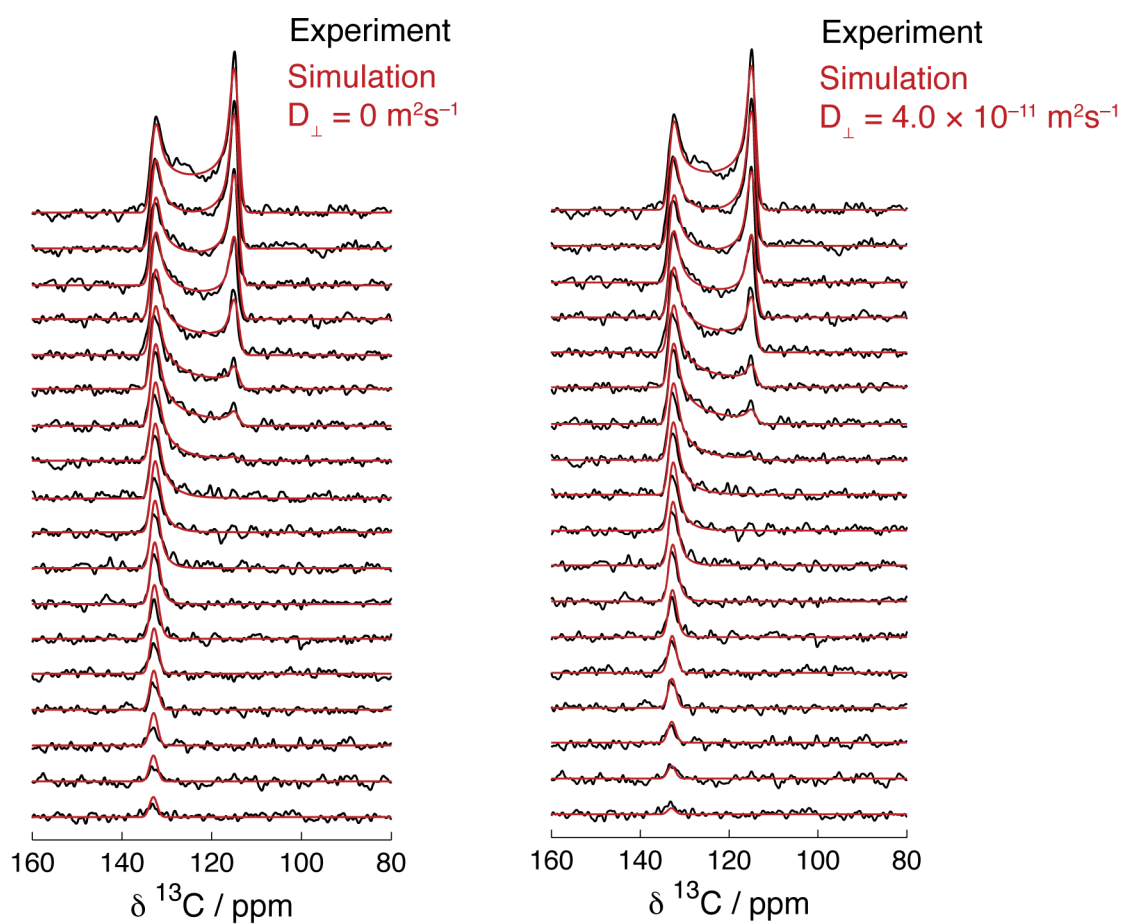

**Figure S4.** Data is reproduced from Figure 4 in the main text, though with data directly overlaid.

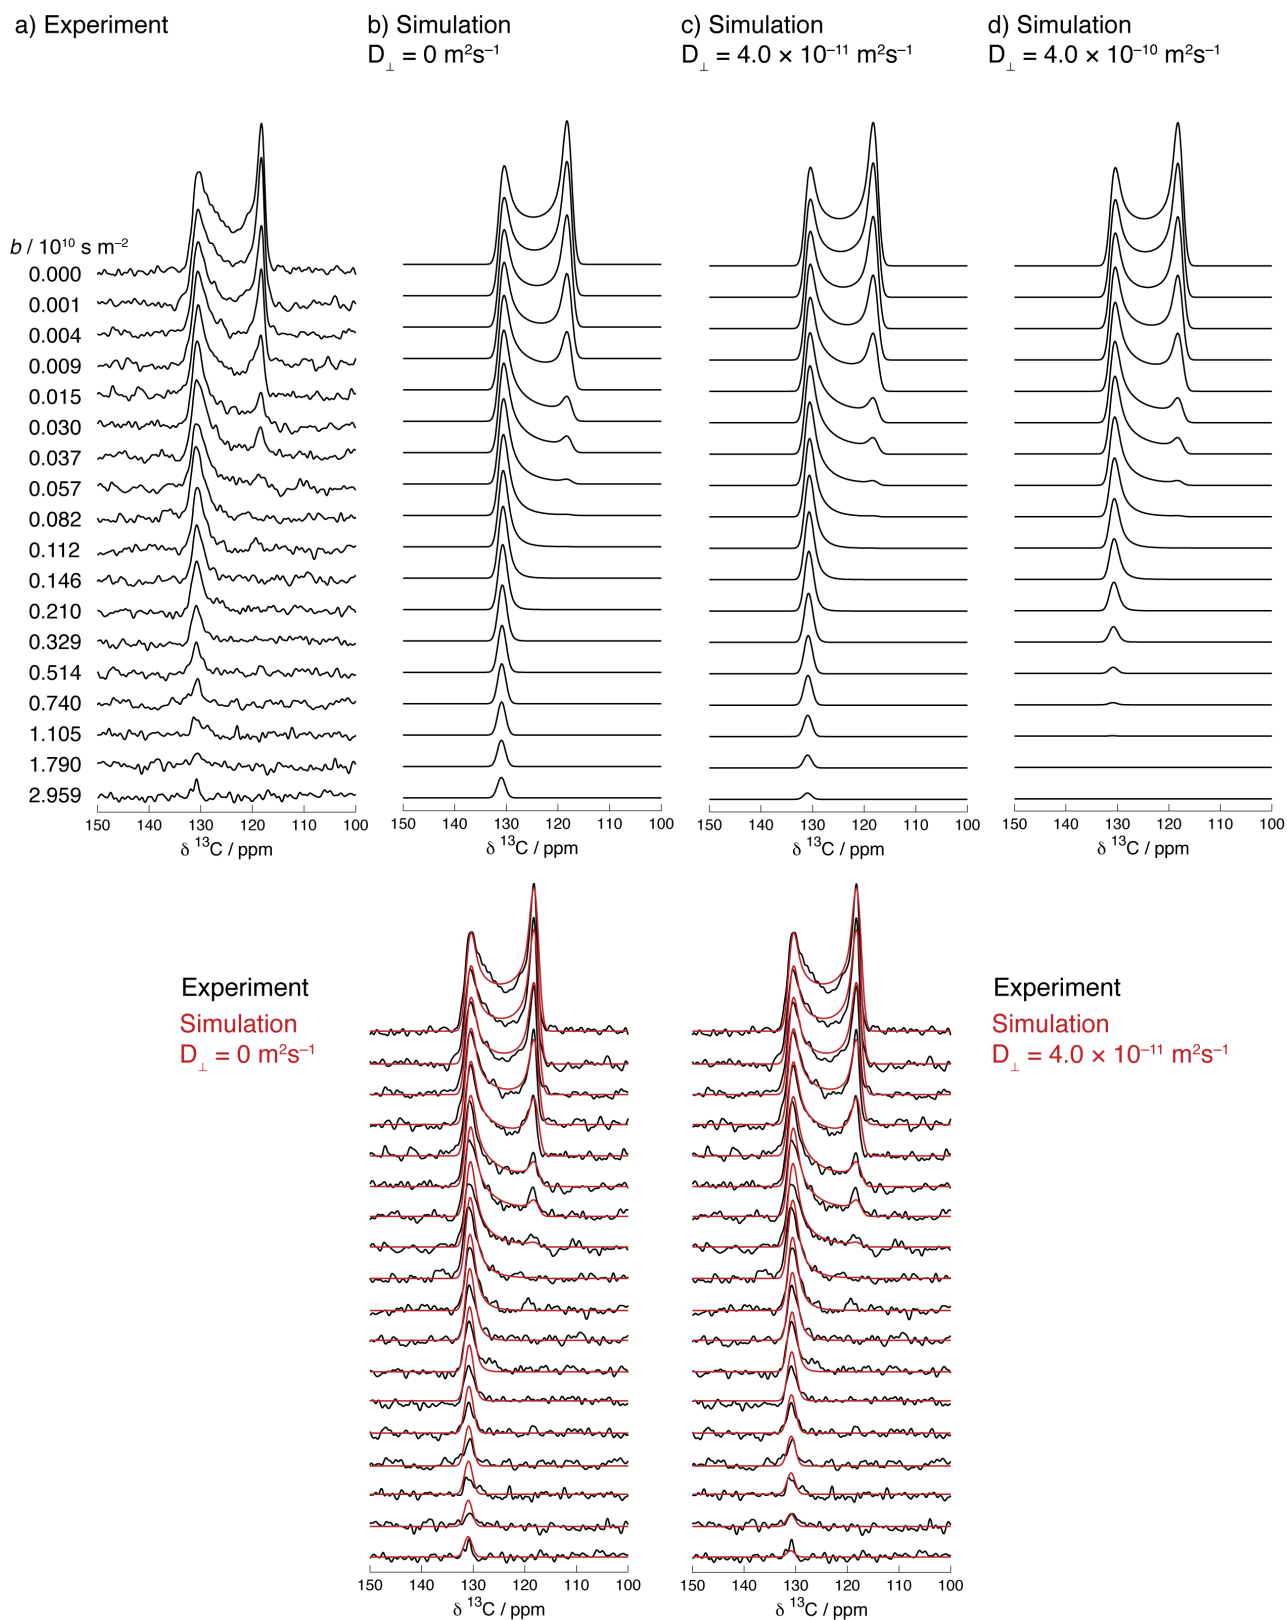

**Figure S5.** Data is analogous to that in the main text Figure 4, except the gas dosing pressure is 1010 mbar. Simulation parameters:  $D_{\parallel} = 6.2 \times 10^{-9} \text{ m}^2 \text{ s}^{-1}$ ,  $\delta_s = 131.0 \text{ ppm}$ ,  $\delta_{\parallel} = 117.8 \text{ ppm}$ , Gaussian lineshapes with a FWHM of 1.8 ppm.  $D_{\perp}$  was varied in the three different simulations. Overlays are shown at the bottom for ease of comparison.

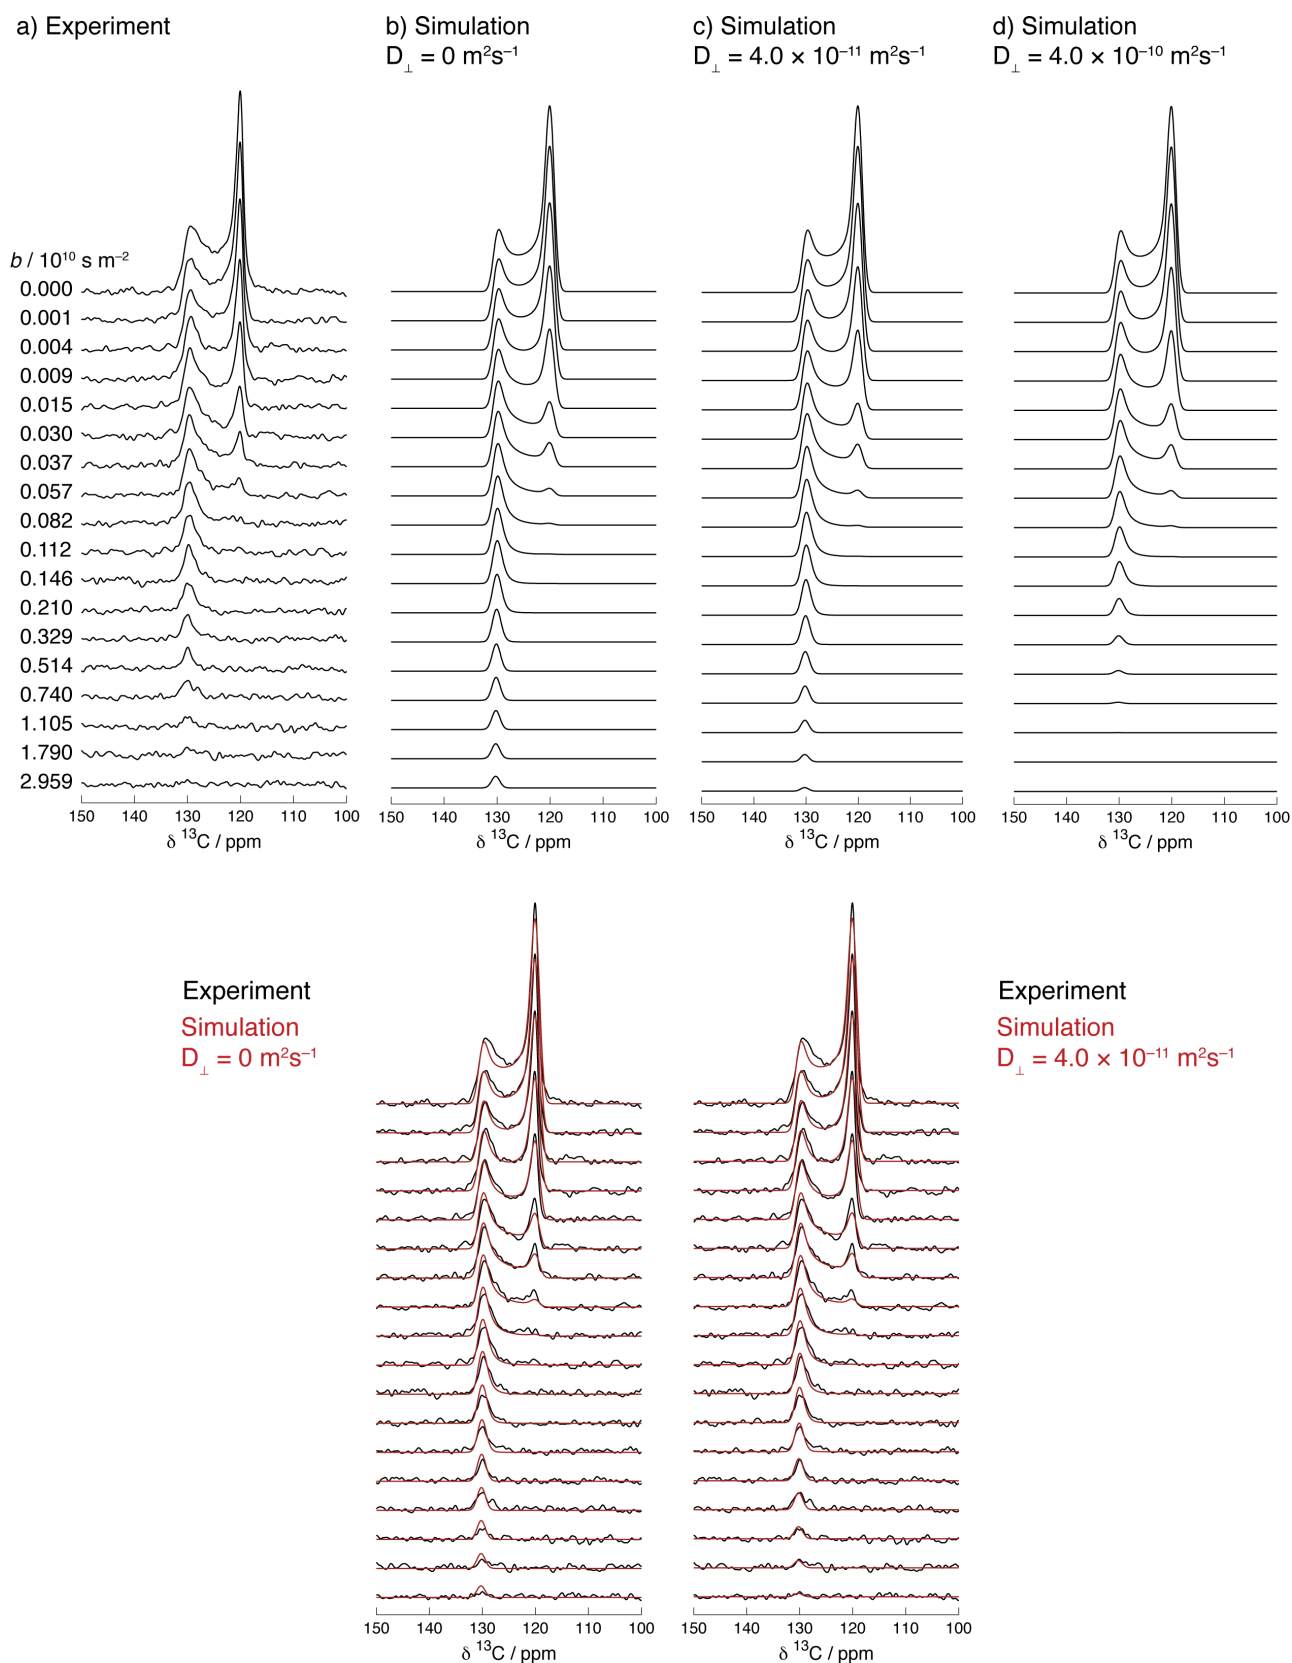

**Figure S6.** Data is analogous to that in the main text Figure 4, except the gas dosing pressure is 625 mbar. Simulation parameters:  $D_{\parallel} = 5.8 \times 10^{-9} \text{ m}^2 \text{ s}^{-1}$ ,  $\delta_s = 130.3 \text{ ppm}$ ,  $\delta_{\parallel} = 119.8 \text{ ppm}$ , Gaussian lineshapes with a FWHM of 1.8 ppm.  $D_{\perp}$  was varied in the three different simulations. Overlays are shown at the bottom for ease of comparison.

a)  $^{13}\text{CO}_2$  pressure = 1010 mbar

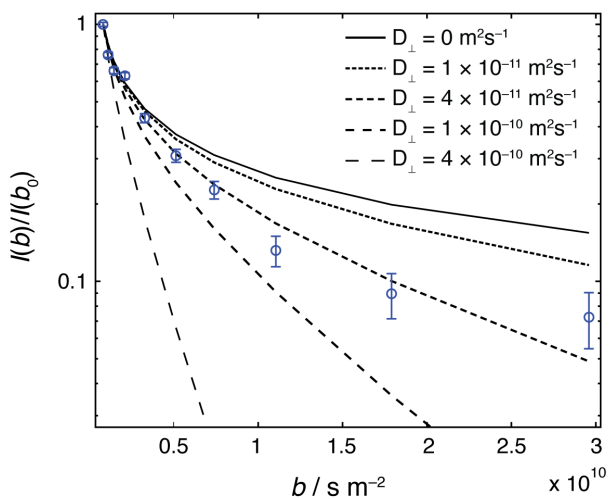

b)  $^{13}\text{CO}_2$  pressure = 625 mbar

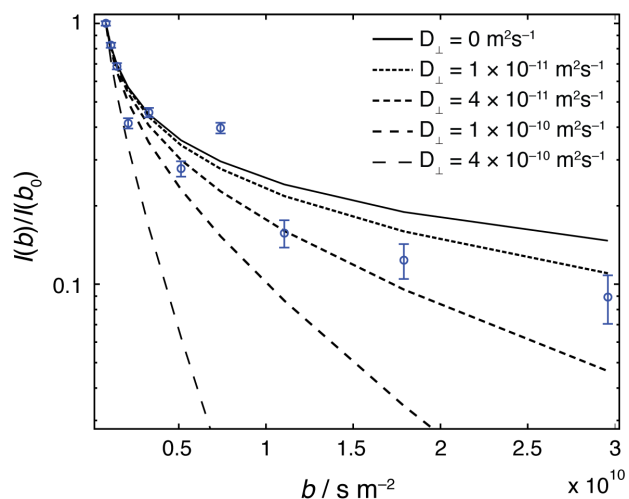

**Figure S7.** Plots analogous to Figure 5a in the main text, with different  $^{13}\text{CO}_2$  gas-dosing pressures of a) 1010 mbar and b) 625 mbar.



a) 2026 mbar

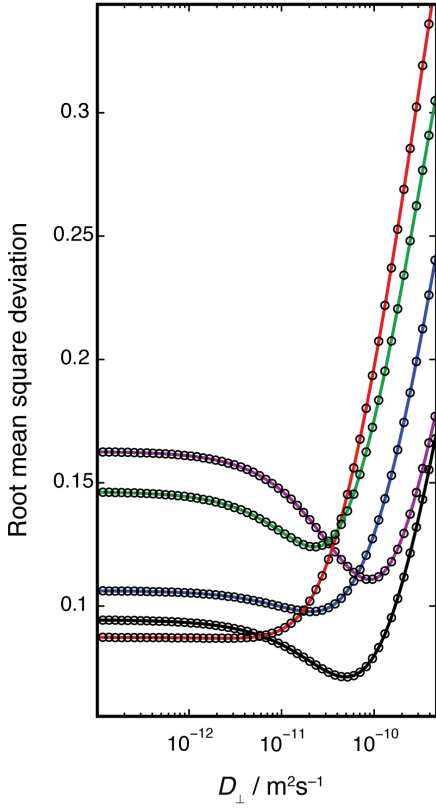

b) 1010 mbar

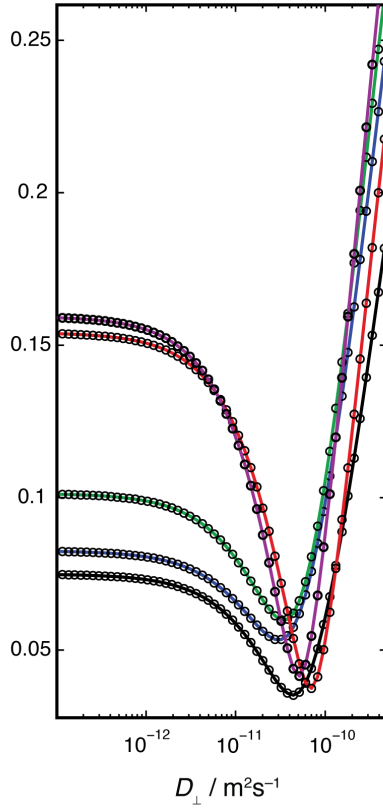

c) 625 mbar

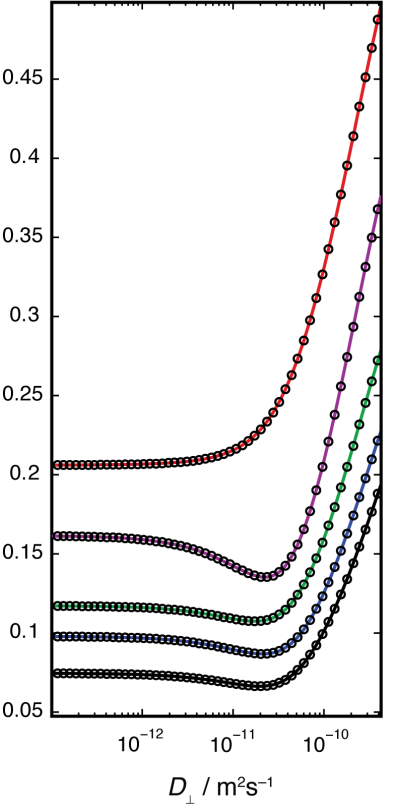

**Figure S8.** Root mean square deviation plots similar to those shown in the main text, Figure 5b. For each gas pressure, five curves are shown, which correspond to data with,  $b \geq 8.2 \times 10^8 \text{ s m}^{-2}$  (black line),  $b \geq 1.12 \times 10^9 \text{ s m}^{-2}$  (blue line),  $b \geq 1.46 \times 10^9 \text{ s m}^{-2}$  (green line),  $b \geq 2.10 \times 10^9 \text{ s m}^{-2}$  (red line), and  $b \geq 3.29 \times 10^9 \text{ s m}^{-2}$  (purple line). The root mean square deviations are not normalized to account for the different numbers of data points used in the fits.

## References

- (1) Bak, M.; Rasmussen, J. T.; Nielsen, N. C. SIMPSON : A General Simulation Program for Solid-State NMR Spectroscopy. *J. Magn. Reson.* **2000**, *147*, 296–330.
- (2) Forse, A. C.; Gonzalez, M. I.; Siegelman, R. L.; Witherspoon, V. J.; Jawahery, S.; Mercado, R.; Milner, P. J.; Martell, J. D.; Smit, B.; Blümich, B.; et al. Unexpected Diffusion Anisotropy of Carbon Dioxide in the Metal–Organic Framework Zn<sub>2</sub>(dobpdc). *J. Am. Chem. Soc.* **2018**, *140*, 1663–1673.
